# Supplementary material for: Haematopoietic stem cell survival and transplantation efficacy is limited by the BH3-only proteins Bim and Bmf
Source: PubMed Central journal article supplement (PMC3569658; doi:10.1002/emmm.201201235), 2012-11-24
Supplement: emmm0005-0122-SD2.pdf [file emmm0005-0122-SD2.pdf]

## Supplementary information

### **Haematopoietic Stem Cell Survival and Transplantation Efficacy is Limited by the BH3-only Proteins Bim and Bmf**

Verena Labi<sup>\*</sup>, Daniela Bertele<sup>\*</sup>, Claudia Woess, Denise Tischner, Florian J. Bock, Sven Schwemmers, Heike L. Pahl, Stephan Geley, Mirjam Kunze, Charlotte M. Niemeyer, Andreas Villunger and Miriam Erlacher

|                  |                                                                                                                                                                                                                                                                                                             |
|------------------|-------------------------------------------------------------------------------------------------------------------------------------------------------------------------------------------------------------------------------------------------------------------------------------------------------------|
| Suppl. Table I   | shRNA-sequences cloned into pLeGOhU6-G vectors and primers used for qRT-PCR                                                                                                                                                                                                                                 |
| Suppl. Table II  | MLPA data for murine LSK and human CD34 <sup>+</sup> cells subjected to cytokine withdrawal <i>in vitro</i>                                                                                                                                                                                                 |
| Suppl. Table III | Cell composition in wt: <i>bmf</i> <sup>-/-</sup> , wt: <i>bim</i> <sup>-/-</sup> and wt: <i>bcl-2 tg</i> BM chimeras 16 weeks after competitive transplantation                                                                                                                                            |
| Suppl.Fig. 1     | qRT-PCR data for Bcl-2 family members in murine LSK cells subjected to cytokine withdrawal (A/B)<br>Analysis of %Ly5.2 <sup>+</sup> LSK cells 5 days after competitive transplantation                                                                                                                      |
| Suppl.Fig. 2     | Representative dot plots and gates used for data analysis                                                                                                                                                                                                                                                   |
| Suppl.Fig. 3     | Homing and proliferation experiments performed with wt and Bim-deficient LSK cells                                                                                                                                                                                                                          |
| Suppl.Fig. 4     | Serial transplantations of wt, <i>bim</i> <sup>-/-</sup> , <i>bmf</i> <sup>-/-</sup> and <i>bcl-2 tg</i> LSK cells                                                                                                                                                                                          |
| Suppl.Fig. 5     | Cytokine-deprivation induced apoptosis of human CD34 <sup>+</sup> cells (A),<br>qRT-PCR for BIM, PUMA and BMF in human CD34 <sup>+</sup> cells (B),<br>Western blot showing efficient downregulation of either BIM or BMF as well as overexpression of BCL-XL or BCL-2 in human CD34 <sup>+</sup> cells (C) |
| Suppl.Fig. 6     | Analysis of CD19 <sup>+</sup> B and CD33 <sup>+</sup> myeloid cells arising in <i>rag2</i> <sup>-/-</sup> <i>γc</i> <sup>-/-</sup> mice reconstituted intrahepatically with human cord blood derived HSPCs                                                                                                  |
| Suppl.Fig. 7     | Analysis of <i>rag2</i> <sup>-/-</sup> <i>γc</i> <sup>-/-</sup> mice transplanted intravenously with human CD34 <sup>+</sup> cells                                                                                                                                                                          |

# Labi\_et\_al\_Suppl\_Table I

## **shRNA sequences:**

|            |                       |
|------------|-----------------------|
| BIM        | TGATGTAAGTTCTGAGTGTG  |
| BMF        | TCAGCCGACTTCAGCTCTT   |
| Luciferase | CGCTGAGTACTTCGAAATGTC |

## **qRT-PCR primers (5'-3'):**

|             |           |                       |
|-------------|-----------|-----------------------|
| actin (mu.) | sense     | ACTGGGACGACATGGAGAAG  |
|             | antisense | GGGGTGTGTAAGGTCTCAAA  |
| bad (mu)    | sense     | GGACTTATCAGCCGAAGCAG  |
|             | antisense | GCTCAAACCTCTGGGATCTGG |
| bcl-2 (mu)  | sense     | CTGGCATCTTCTCCTTCCAG  |
|             | antisense | GACGGTAGCGACGAGAGAAG  |
| bcl-xL (mu) | sense     | TTCGGGATGGAGTAAACTGG  |
|             | antisense | TGGATCCAAGGCTCTAGGTG  |
| bim (mu)    | sense     | GAGATACGGATTGCACAGGA  |
|             | antisense | TCAGCCTCGCGGTAATCATT  |
| bmf (mu)    | sense     | CCCATAAGCCAGGAAGACAA  |
|             | antisense | AGGGAGAGGAAGCCTGTAGC  |
| mcl-1 (mu)  | sense     | TAACAAACTGGGGCAGGATT  |
|             | antisense | GTCCCGTTTCGTCCTTACAA  |
| noxa (mu)   | sense     | CCCCTCCTGGGAAAGTACA   |
|             | antisense | AATCCCTTCAGCCCTTGATT  |
| puma (mu)   | sense     | CAAGAAGAGCAGCATCGACA  |
|             | antisense | TAGTTGGGCTCCATTTCTGG  |
| 18S (hu)    | sense     | TCAAGAACGAAAGTCGGAGG  |
|             | antisense | GGACATCTAAGGGCATCACA  |
| BimEL (hu)  | sense     | TGACACAGACAGGAGCCCAGC |
|             | antisense | CGCCGCAACTCTTGGGCGAT  |
| BMF (hu)    | sense     | GTGCTCGTCACGCTGGACCC  |
|             | antisense | GGTCACCGGCTCCCCATCCT  |

### **Suppl. Table I:**

shRNA-sequences cloned into pLeGOhU6-G vectors and primers used for qRT-PCR are indicated (mu: murine; hu: human).

## Labi\_et\_al\_Suppl\_Table II

### murine LSK cells

|             | + Cytokines |      | - Cytokines |      | p value |
|-------------|-------------|------|-------------|------|---------|
|             | Mean        | SEM  | Mean        | SEM  |         |
| Bcl-w       | 1           | 0.13 | 0.76        | 0.32 | 0.72    |
| FLIP        | 1           | 0.17 | 0.89        | 0.24 | 0.86    |
| Bcl-g       | 1           | 0.47 | 0.30        | 0.30 | 0.36    |
| Bcl-rambo   | 1           | 0.12 | 0.95        | 0.04 | 0.20    |
| MOAP-1      | 1           | 0.21 | 0.53        | 0.15 | 0.06    |
| APAF1       | 1           | 0.20 | 1.22        | 0.23 | 0.36    |
| AIF         | 1           | 0.24 | 0.62        | 0.09 | 0.20    |
| XIAP        | 1           | 0.35 | 1.81        | 0.26 | 0.07    |
| Survivin    | 1           | 0.28 | 0.65        | 0.07 | 0.27    |
| BIRC1A      | 1           | 0.31 | 2.01        | 0.36 | 0.10    |
| CIAP1       | 1           | 0.34 | 2.35        | 0.68 | 0.07    |
| CIAP2       | 1           | 0.20 | 1.28        | 0.06 | 0.07    |
| BIRC6       | 1           | 0.10 | 1.25        | 0.21 | 0.72    |
| OMI         | 1           | 0.24 | 0.70        | 0.24 | 0.14    |
| B2M         | 1           | 0.08 | 1.42        | 0.34 | 0.27    |
| P21         | 1           | 0.21 | 0.90        | 0.31 | 0.86    |
| Smac/Diablo | 1           | 0.45 | 0.43        | 0.43 | 0.47    |
| PAK2        | 1           | 0.45 | 0.38        | 0.24 | 0.41    |

### human CD34+ cells

|             | + Cytokines |      | - Cytokines |      | p value |
|-------------|-------------|------|-------------|------|---------|
|             | Mean        | SEM  | Mean        | SEM  |         |
| DR6         | 1           | 0.08 | 1.04        | 0.09 | 0.57    |
| P21         | 1           | 0.12 | 0.54        | 0.10 | 0.02    |
| Omi         | 1           | 0.10 | 1.26        | 0.06 | 0.11    |
| Bcl-w       | 1           | 0.09 | 1.12        | 0.19 | 0.85    |
| FLIP        | 1           | 0.12 | 2.18        | 0.19 | 0.002   |
| Bcl-rambo   | 1           | 0.03 | 1.11        | 0.06 | 0.18    |
| Birc1       | 1           | 0.22 | 3.94        | 0.80 | 0.002   |
| Birc2       | 1           | 0.18 | 1.66        | 0.08 | 0.03    |
| Birc3       | 1           | 0.12 | 1.29        | 0.12 | 0.22    |
| XIAP        | 1           | 0.04 | 1.20        | 0.08 | 0.08    |
| Survivin    | 1           | 0.09 | 0.27        | 0.02 | 0.002   |
| Birc6       | 1           | 0.27 | 0.93        | 0.06 | 0.22    |
| Serpin-B    | 1           | 0.07 | 0.95        | 0.04 | 0.95    |
| PARN        | 1           | 0.24 | 0.71        | 0.05 | 0.18    |
| AIF         | 1           | 0.06 | 0.80        | 0.07 | 0.14    |
| GUSB        | 1           | 0.09 | 1.16        | 0.04 | 0.06    |
| Bnip-3L     | 1           | 0.19 | 4.13        | 0.35 | 0.002   |
| Apaf1       | 1           | 0.11 | 1.49        | 0.15 | 0.02    |
| Perforin    | 1           | 0.54 | 0.86        | 0.58 | 0.75    |
| Bnip-3      | 1           | 0.25 | 1.29        | 0.14 | 0.11    |
| Smac/Diablo | 1           | 0.07 | 0.84        | 0.06 | 0.18    |
| Fas         | 1           | 0.13 | 1.64        | 0.32 | 0.14    |

### **Suppl. Table II:**

Upper table: Murine wt LSK cells were isolated and cultured for 14h in the presence or absence of SCF, TPO and Flt3L (100 ng/ml each). mRNA levels of the indicated genes were determined by MLPA (n=5-6, 4 independent experiments). Lower table: Fresh human CD34<sup>+</sup> cells were cultured for 14h in the presence or absence of SCF, IL6, Flt3L (100 ng/ml each) and TPO (10 ng/ml). mRNA levels of the indicated genes were determined by MLPA (n=7, 5 independent experiments, Mann-Whitney-Test) but not confirmed by qRT-PCR.

# Labi\_et\_al\_Suppl\_Table III

|                                                       |                   | wt:wt        | wt: <i>bmf</i> <sup>-/-</sup> |        | wt: <i>bim</i> <sup>-/-</sup> |      | wt: <i>bcl-2 tg</i> |      |
|-------------------------------------------------------|-------------------|--------------|-------------------------------|--------|-------------------------------|------|---------------------|------|
| <b>BONE MARROW</b>                                    |                   |              |                               |        |                               |      |                     |      |
| Cell no. (2 femura)                                   | x 10 <sup>7</sup> | 7.93 ±0.56   | 8.37 ± 1.63                   | p=0.88 | 7.12 ± 1.20                   | 0.46 | 8.88 ± 1.33         | 0.90 |
| Ly5.1 <sup>+</sup> LSK                                | x 10 <sup>4</sup> | 8.29 ±2.30   | 4.55 ± 0.28                   | 0.10   | 2.09 ± 0.83                   | 0.03 | 1.81 ± 0.51         | 0.01 |
| Ly5.2 <sup>+</sup> LSK                                | x 10 <sup>4</sup> | 9.13 ±2.46   | 11.50 ± 0.84                  | 0.18   | 17.40 ± 3.97                  | 0.14 | 14.36 ± 3.11        | 0.09 |
| Ly5.1 <sup>+</sup> LSK CD150 <sup>+</sup>             | x 10 <sup>3</sup> | 15.66 ±6.76  | 11.97 ± 5.35                  | 0.88   | 3.10 ± 1.04                   | 0.01 | 2.28 ± 0.52         | 0.01 |
| Ly5.2 <sup>+</sup> LSK CD150 <sup>+</sup>             | x 10 <sup>3</sup> | 16.69 ±7.22  | 34.88 ± 11.27                 | 0.10   | 20.04 ± 6.43                  | 0.62 | 17.21 ± 4.83        | 0.62 |
| Ly5.1 <sup>+</sup> preB                               | x 10 <sup>6</sup> | 1.60 ±0.30   | 0.95 ± 0.34                   | 0.18   | 0.25 ± 0.08                   | 0.01 | 0.17 ± 0.02         | 0.01 |
| Ly5.2 <sup>+</sup> preB                               | x 10 <sup>6</sup> | 2.41 ±0.47   | 2.48 ± 0.83                   | 0.65   | 5.53 ± 2.28                   | 0.62 | 10.49 ± 3.41        | 0.01 |
| Ly5.1 <sup>+</sup> monocytes                          | x 10 <sup>6</sup> | 6.34 ±1.39   | 3.84 ± 1.22                   | 0.30   | 1.07 ± 0.34                   | 0.01 | 1.55 ± 0.17         | 0.01 |
| Ly5.2 <sup>+</sup> monocytes                          | x 10 <sup>6</sup> | 8.14 ±2.31   | 14.09 ± 2.60                  | 0.10   | 15.60 ± 5.37                  | 0.09 | 12.92 ± 1.36        | 0.14 |
| Ly5.1 <sup>+</sup> granulocytes                       | x 10 <sup>6</sup> | 11.20 ±1.93  | 5.42 ± 1.26                   | 0.05   | 1.11 ± 0.18                   | 0.01 | 3.05 ± 0.54         | 0.01 |
| Ly5.2 <sup>+</sup> granulocytes                       | x 10 <sup>6</sup> | 15.47 ±1.93  | 21.67 ± 6.14                  | 0.46   | 15.19 ± 4.08                  | 0.81 | 19.43 ± 2.82        | 0.22 |
| <b>THYMUS</b>                                         |                   |              |                               |        |                               |      |                     |      |
| Thymocyte no.                                         | x 10 <sup>7</sup> | 9.5 ±1.65    | 12.04 ± 2.25                  | 0.76   | 4.62 ± 1.62                   | 0.09 | 13.91 ± 4.60        | 0.46 |
| Ly5.1 <sup>+</sup> DN                                 | x 10 <sup>6</sup> | 1.18 ±0.21   | 0.98 ± 0.27                   | 0.65   | 0.022 ± 0.006                 | 0.01 | 0.060 ± 0.023       | 0.01 |
| Ly5.2 <sup>+</sup> DN                                 | x 10 <sup>6</sup> | 1.77 ±0.35   | 2.69 ± 0.14                   | 0.03   | 3.84 ± 1.59                   | 0.22 | 17.72 ± 8.48        | 0.01 |
| Ly5.1 <sup>+</sup> DP                                 | x 10 <sup>6</sup> | 17.96 ±3.47  | 18.16 ± 5.80                  | 0.88   | 0.11 ± 0.05                   | 0.01 | 0.58 ± 0.27         | 0.01 |
| Ly5.2 <sup>+</sup> DP                                 | x 10 <sup>6</sup> | 51.57 ±12.37 | 73.52 ± 24.57                 | 0.65   | 25.08 ± 8.93                  | 0.14 | 70.36 ± 23.14       | 0.46 |
| Ly5.1 <sup>+</sup> CD4 <sup>+</sup>                   | x 10 <sup>6</sup> | 3.81 ±0.99   | 3.19 ± 0.61                   | 0.65   | 0.077 ± 0.031                 | 0.01 | 0.20 ± 0.07         | 0.01 |
| Ly5.2 <sup>+</sup> CD4 <sup>+</sup>                   | x 10 <sup>6</sup> | 9.98 ±2.26   | 11.76 ± 4.15                  | 0.88   | 12.38 ± 4.06                  | 0.33 | 31.91 ± 8.87        | 0.14 |
| Ly5.1 <sup>+</sup> CD8 <sup>+</sup>                   | x 10 <sup>6</sup> | 1.34 ±0.36   | 0.79 ± 0.15                   | 0.46   | 0.013 ± 0.005                 | 0.01 | 0.066 ± 0.022       | 0.01 |
| Ly5.2 <sup>+</sup> CD8 <sup>+</sup>                   | x 10 <sup>6</sup> | 2.40 ±0.54   | 2.69 ± 0.58                   | 0.88   | 4.04 ± 1.50                   | 0.22 | 16.17 ± 6.58        | 0.01 |
| <b>SPLEEN</b>                                         |                   |              |                               |        |                               |      |                     |      |
| Cell no.                                              | x 10 <sup>7</sup> | 11.11 ±1.51  | 17.64 ± 1.46                  | 0.03   | 20.69 ± 4.74                  | 0.09 | 22.01 ± 4.90        | 0.14 |
| Ly5.1 <sup>+</sup> CD4 <sup>+</sup>                   | x 10 <sup>7</sup> | 0.63 ±0.17   | 0.83 ± 0.12                   | 0.46   | 0.38 ± 0.27                   | 0.46 | 0.14 ± 0.03         | 0.09 |
| Ly5.2 <sup>+</sup> CD4 <sup>+</sup>                   | x 10 <sup>7</sup> | 1.03 ±0.15   | 2.08 ± 0.29                   | 0.03   | 3.12 ± 0.64                   | 0.01 | 4.09 ± 0.61         | 0.01 |
| Ly5.1 <sup>+</sup> CD8 <sup>+</sup>                   | x 10 <sup>7</sup> | 0.41 ±0.10   | 0.67 ± 0.12                   | 0.30   | 0.28 ± 0.19                   | 0.22 | 0.12 ± 0.04         | 0.03 |
| Ly5.2 <sup>+</sup> CD8 <sup>+</sup>                   | x 10 <sup>7</sup> | 0.70 ±0.16   | 1.04 ± 0.09                   | 0.10   | 1.72 ± 0.44                   | 0.09 | 2.28 ± 0.56         | 0.09 |
| Ly5.1 <sup>+</sup> B220 <sup>+</sup> IgM <sup>+</sup> | x 10 <sup>6</sup> | 22.32 ±4.76  | 21.55 ± 1.51                  | 0.65   | 3.87 ± 0.55                   | 0.01 | 3.15 ± 0.84         | 0.01 |
| Ly5.2 <sup>+</sup> B220 <sup>+</sup> IgM <sup>+</sup> | x 10 <sup>6</sup> | 33.07 ±7.16  | 63.01 ± 6.49                  | 0.03   | 66.50 ± 12.56                 | 0.09 | 47.08 ± 9.79        | 0.14 |
| Ly5.1 <sup>+</sup> T1                                 | x 10 <sup>6</sup> | 1.91 ±0.51   | 1.74 ± 0.27                   | 0.65   | 0.20 ± 0.04                   | 0.01 | 0.18 ± 0.09         | 0.01 |
| Ly5.2 <sup>+</sup> T1                                 | x 10 <sup>6</sup> | 3.71 ±0.84   | 8.70 ± 2.42                   | 0.10   | 11.28 ± 4.27                  | 0.09 | 11.94 ± 4.22        | 0.09 |
| Ly5.1 <sup>+</sup> T2                                 | x 10 <sup>6</sup> | 3.86 ±0.79   | 4.05 ± 2.15                   | 0.65   | 0.67 ± 0.24                   | 0.01 | 0.47 ± 0.18         | 0.01 |
| Ly5.2 <sup>+</sup> T2                                 | x 10 <sup>6</sup> | 7.47 ±1.48   | 11.53 ± 0.18                  | 0.03   | 15.17 ± 6.02                  | 0.33 | 9.67 ± 2.27         | 0.46 |
| Ly5.1 <sup>+</sup> monocytes                          | x 10 <sup>6</sup> | 2.11 ±0.56   | 1.90 ± 0.52                   | 0.65   | 0.64 ± 0.25                   | 0.05 | 0.82 ± 0.33         | 0.14 |
| Ly5.2 <sup>+</sup> monocytes                          | x 10 <sup>6</sup> | 2.00 ±0.55   | 4.71 ± 0.99                   | 0.05   | 7.95 ± 2.91                   | 0.03 | 6.48 ± 2.21         | 0.14 |
| Ly5.1 <sup>+</sup> granulocytes                       | x 10 <sup>6</sup> | 0.93 ±0.24   | 0.33 ± 0.06                   | 0.05   | 0.13 ± 0.05                   | 0.01 | 0.27 ± 0.10         | 0.03 |
| Ly5.2 <sup>+</sup> granulocytes                       | x 10 <sup>6</sup> | 0.73 ±0.18   | 0.99 ± 0.06                   | 0.46   | 2.16 ± 0.56                   | 0.01 | 1.73 ± 0.58         | 0.22 |
| Ly5.1 <sup>+</sup> Ter119 <sup>+</sup>                | x 10 <sup>6</sup> | 4.25 ±1.23   | 3.84 ± 1.81                   | 0.88   | 0.25 ± 0.05                   | 0.01 | 0.51 ± 0.24         | 0.03 |
| Ly5.2 <sup>+</sup> Ter119 <sup>+</sup>                | x 10 <sup>6</sup> | 4.35 ±1.65   | 9.74 ± 6.28                   | 0.45   | 12.20 ± 3.58                  | 0.14 | 17.62 ± 7.02        | 0.09 |
| <b>BLOOD</b>                                          |                   |              |                               |        |                               |      |                     |      |
| WBC number                                            | /μl               | 23320 ±1480  | 16433 ± 5182                  | 0.18   | 17900 ± 5121                  | 0.54 | 26175 ± 2550        | 0.46 |
| Ly5.1 <sup>+</sup> CD4 <sup>+</sup>                   | /μl               | 1003 ±131    | 428 ± 131                     | 0.03   | 99 ± 31                       | 0.01 | 181 ± 40            | 0.01 |
| Ly5.2 <sup>+</sup> CD4 <sup>+</sup>                   | /μl               | 1622 ±254    | 1150 ± 277                    | 0.30   | 1736 ± 605                    | 0.99 | 3286 ± 1277         | 0.33 |
| Ly5.1 <sup>+</sup> CD8 <sup>+</sup>                   | /μl               | 1266 ±184    | 592 ± 135                     | 0.03   | 152 ± 47                      | 0.01 | 360 ± 85            | 0.01 |
| Ly5.2 <sup>+</sup> CD8 <sup>+</sup>                   | /μl               | 1274 ±148    | 824 ± 207                     | 0.10   | 2270 ± 686                    | 0.22 | 3052 ± 300          | 0.01 |
| Ly5.1 <sup>+</sup> B220 <sup>+</sup> IgM <sup>+</sup> | /μl               | 510 ±98      | 180 ± 40                      | 0.05   | 39 ± 18                       | 0.01 | 90 ± 45             | 0.01 |
| Ly5.2 <sup>+</sup> B220 <sup>+</sup> IgM <sup>+</sup> | /μl               | 824 ±190     | 1077 ± 367                    | 0.30   | 577 ± 283                     | 0.46 | 634 ± 174           | 0.46 |
| Ly5.1 <sup>+</sup> monocytes                          | /μl               | 2452 ±748    | 1156 ± 539                    | 0.30   | 253 ± 128                     | 0.05 | 759 ± 310           | 0.14 |
| Ly5.2 <sup>+</sup> monocytes                          | /μl               | 1994 ±579    | 2220 ± 1040                   | 0.45   | 3110 ± 1630                   | 0.62 | 4030 ± 2070         | 0.46 |
| Ly5.1 <sup>+</sup> granulocytes                       | /μl               | 1019 ±467    | 156 ± 57                      | 0.30   | 248 ± 39                      | 0.62 | 319 ± 137           | 0.46 |
| Ly5.2 <sup>+</sup> granulocytes                       | /μl               | 1087 ±534    | 246 ± 84                      | 0.30   | 1410 ± 259                    | 0.62 | 1088 ± 467          | 0.62 |

## Suppl. Table III:

### Cell composition in wt:*bmf*<sup>-/-</sup>, wt:*bim*<sup>-/-</sup> and wt:*bcl-2 tg* BM chimeras

16 weeks after competitive transplantation recipient mice were sacrificed, and all indicated haematopoietic organs were analyzed in detail by flow cytometry using cell surface marker-specific antibodies. Absolute cell numbers are depicted. Values represent means of n=4-6 animals per genotype from 4 independent experiments (+/- SEM). All p-values are indicated (Mann-Whitney-Test).

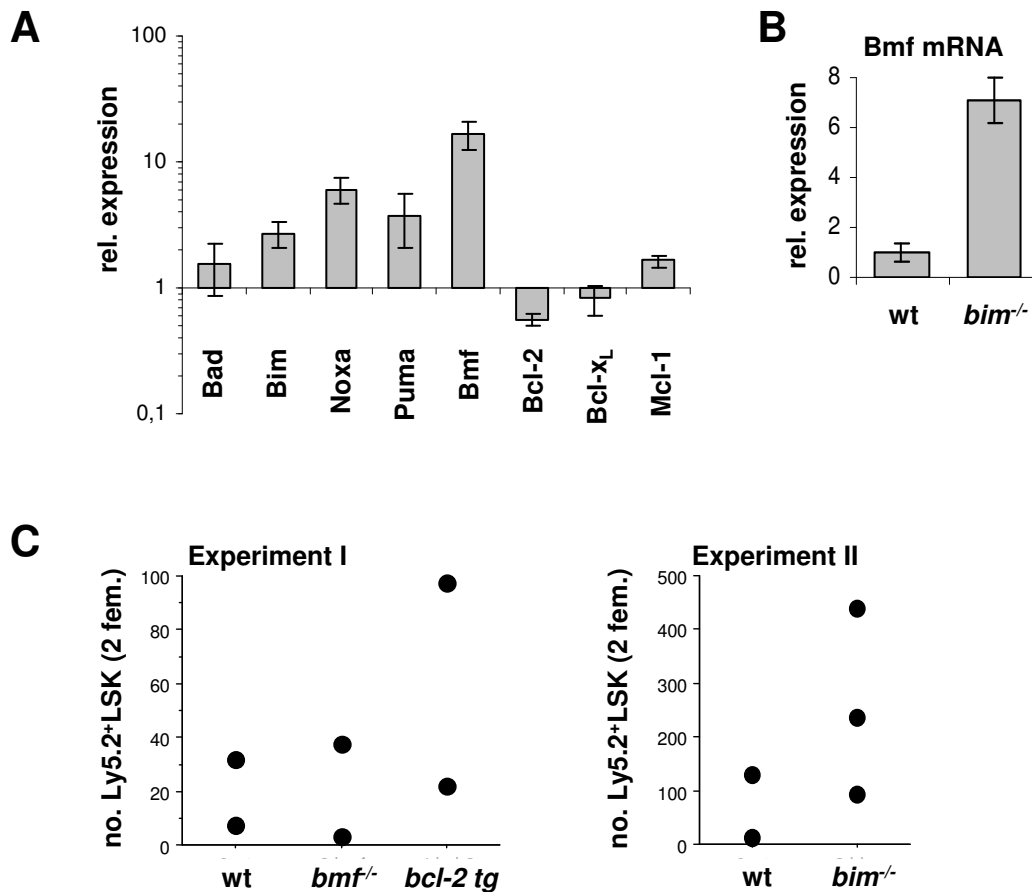**Suppl. Figure 1:**

(A) Wild type LSK cells were isolated and cultured for 14h in the presence or absence of SCF, TPO and Flt3L (100 ng/ml each). mRNA levels of the indicated Bcl-2 family members were determined by qRT-PCR. Bars represent means of two independent experiments  $\pm$ SD.

(B) Bmf expression was analyzed in freshly isolated wt and *bim*<sup>-/-</sup> LSK cells by MLPA, results were confirmed by qPCR (not shown). n=3 per genotype, no significant differences were obtained with the Mann-Whitney-Test.

(C) 5 days after competitive reconstitution, more *bim*<sup>-/-</sup> and *bcl-2 tg* than wt Ly5.2<sup>+</sup> LSK cells could be collected from the recipient's bone marrows. Experiments were highly variable (2 independent experiments shown).

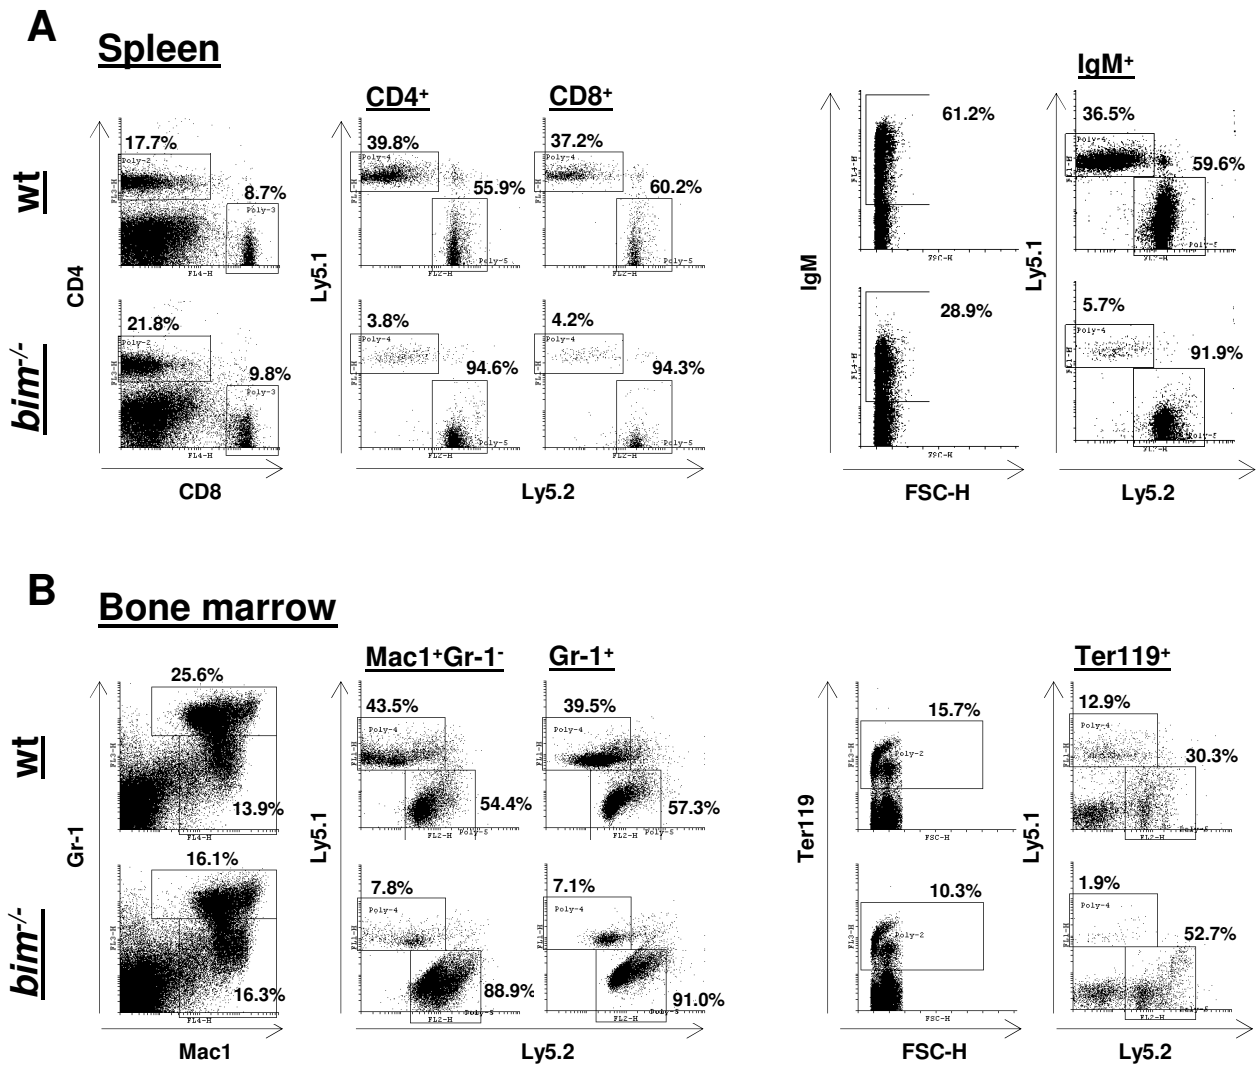

**Suppl. Figure 2:**

Representative dot plots and the gates used for analysis of T, B and myelo-erythroid cell populations are shown for splenic (A) or BM cells (B) isolated from wt and *bim*<sup>-/-</sup> mice.

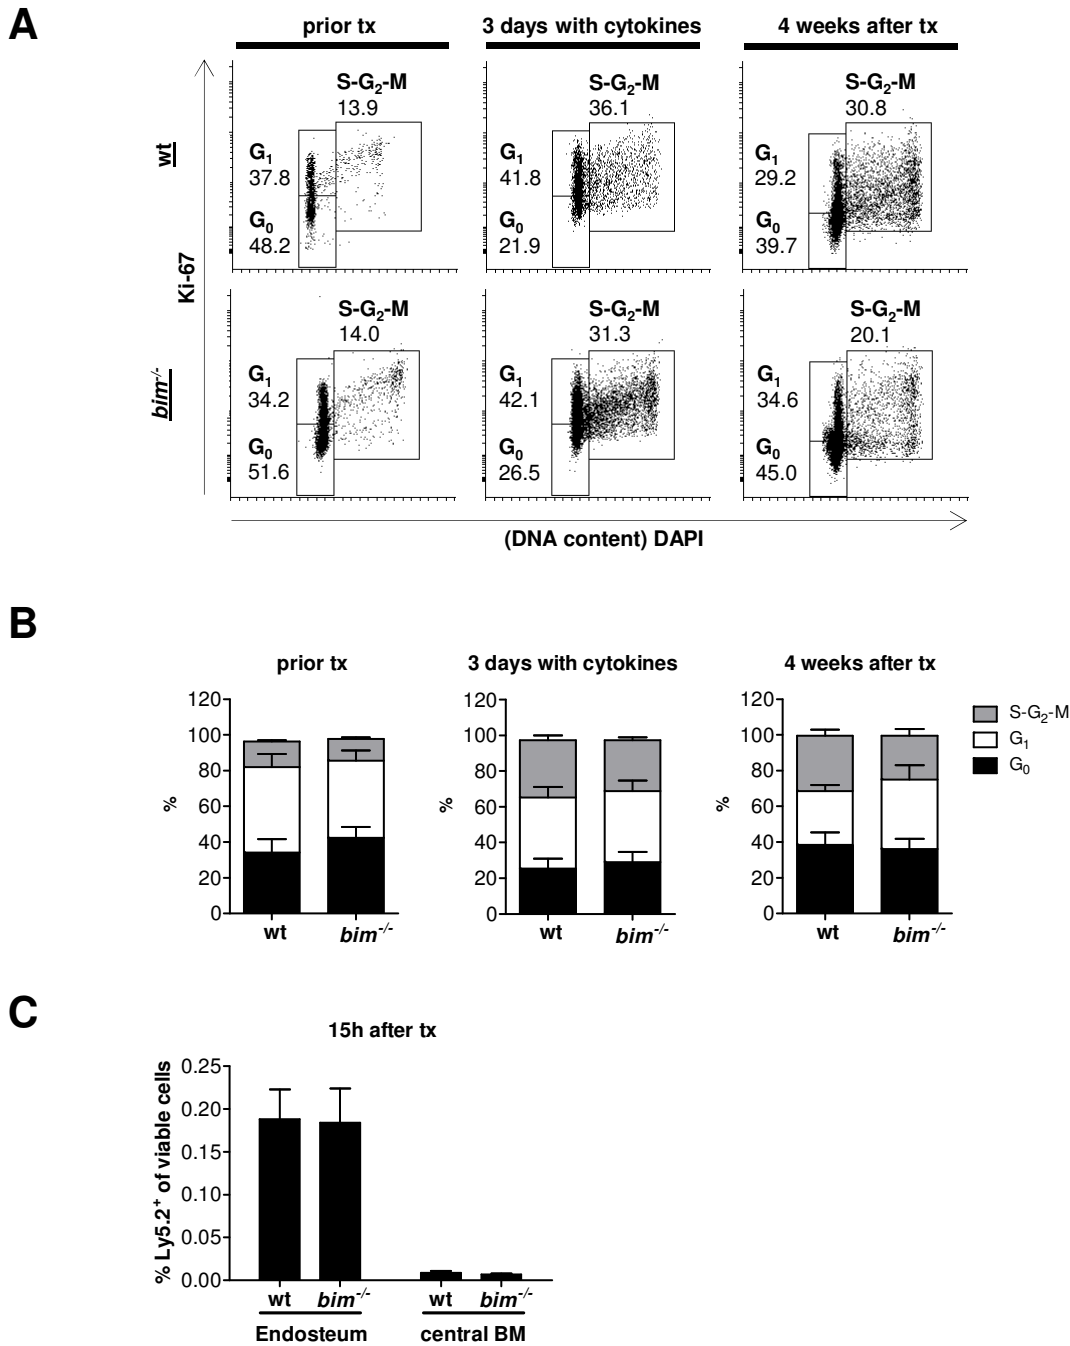

**Suppl. Figure 3:**

(A/B) Wt and *bim*<sup>-/-</sup> LSK cells were isolated from donor mice before transplantation (left, n=3) or from recipient mice 4 weeks after transplantation (right, n=3-4) and stained for Ki-67 and DAPI. To test *in vitro* proliferation, LSK cells were cultured for 72 hours in the presence of TPO, SCF and Flt3L (middle, n=4). Representative dot plots are shown (A). Bars represent means  $\pm$  SEM from 2 independent experiments, no significant differences were obtained (Mann-Whitney-Test) (B). (C) To test for homing potential, recipient mice were sacrificed 15 hours after transplantation with LSK cells derived from the indicated genotypes. BM fractions were isolated as described in the method section. % Ly5.2<sup>+</sup> cells were determined by flow cytometry. Bars represent means  $\pm$  SEM; n=6-8 from 2 independent experiments. No significant differences between genotypes were observed (Mann-Whitney-Test).

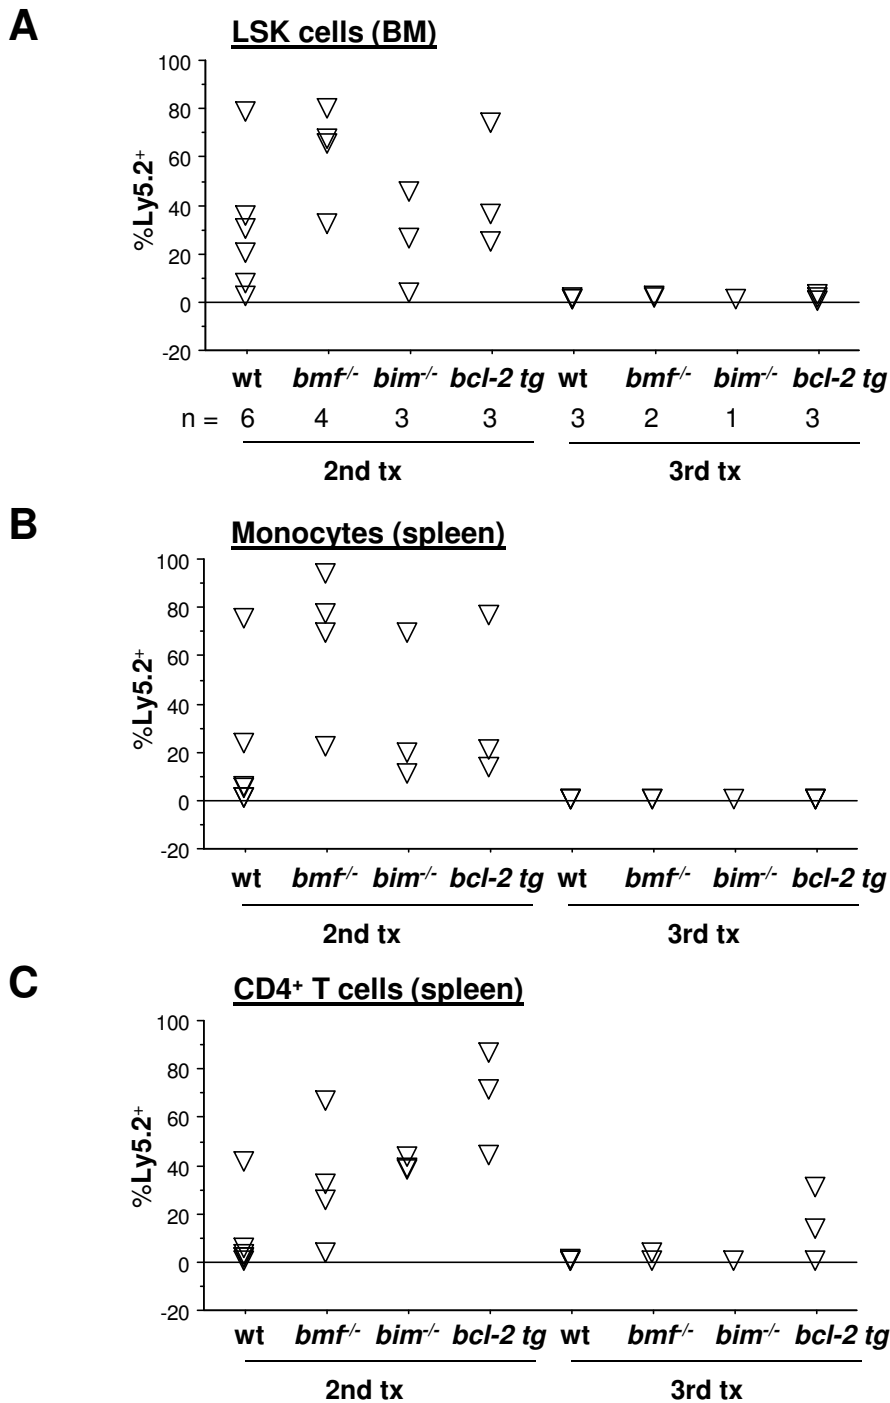

**Suppl. Figure 4:**

Serial transplantations were performed as indicated in the method section at 16 weeks intervals (5,000 Ly5.2<sup>+</sup> LSK cells + 200,000 Ly5.1<sup>+</sup> total BM cells). Since competing BM cells were derived from young, unchallenged Ly5.1 mice they were highly competitive. Whereas Ly5.2<sup>+</sup> LSK cells successfully reconstituted all secondary recipients, no Ly5.2<sup>+</sup> engraftment could be measured following tertiary transplantation, independently of the donor genotype. Graphs show % Ly5.2<sup>+</sup> cells within the LSK cell pool (A), within the splenic monocyte population (B) and within the splenic CD4<sup>+</sup> T cell population (C). Two independent experiments have been performed, n-numbers are indicated in the upper panel. Significant difference has been observed between wt and *bcl-2 tg* CD4<sup>+</sup> T cells in the spleen during 2<sup>nd</sup> transplantation (p=0.02, Mann-Whitney-Test).



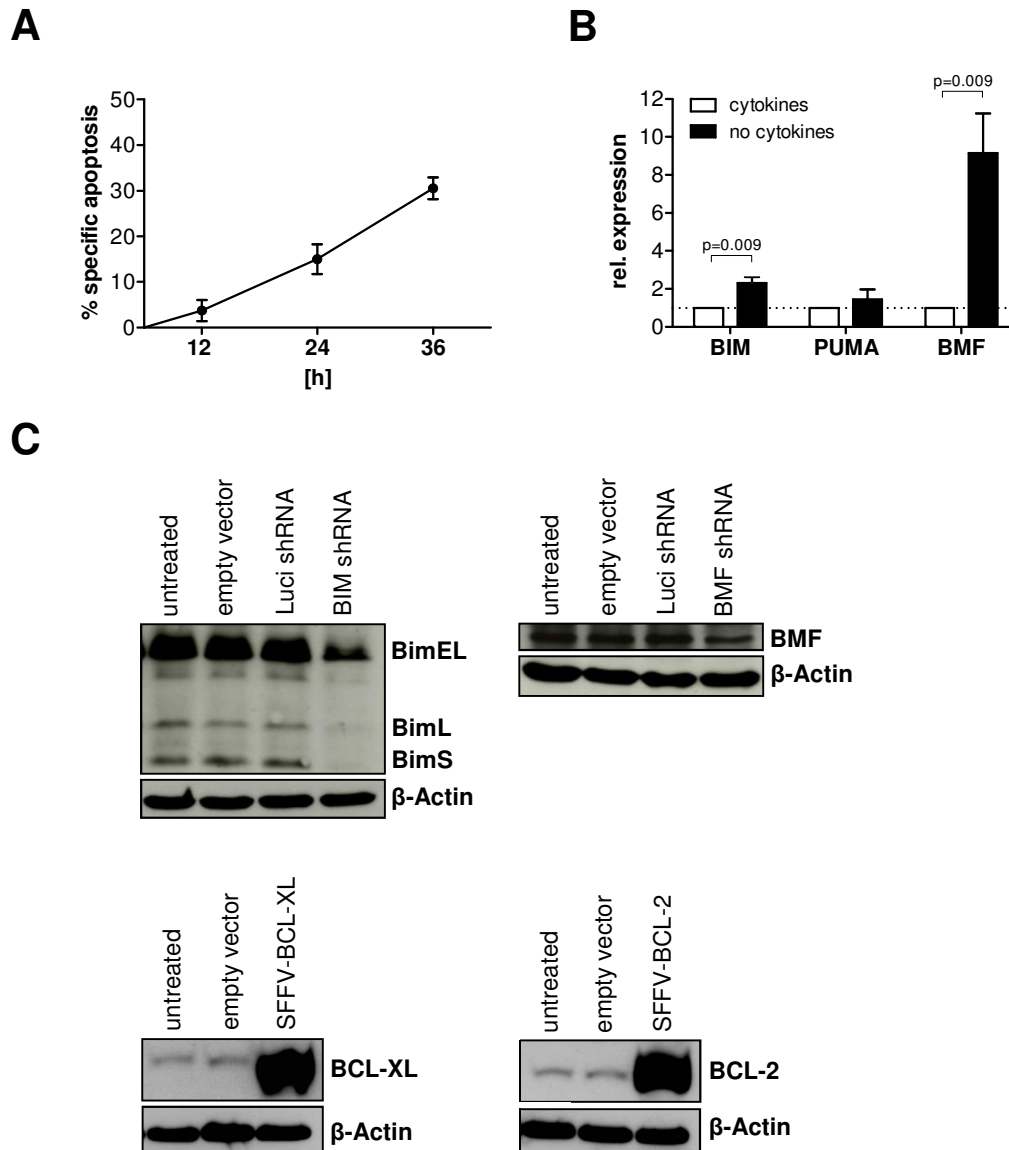

**Suppl. Figure 5:**

(A) Fresh cord blood derived CD34<sup>+</sup> cells were cultured in the presence or absence of SCF, IL6, Flt3L (100 ng/ml each) and TPO (10 ng/ml). Cytokine-deprivation induced apoptosis was determined by combined staining with AnnexinV and 7-AAD and subsequent flow cytometry at the indicated time points. (B) Upregulation of BIM and BMF mRNA induced by cytokine deprivation observed in MLPA (Fig.5) were confirmed by qRT-PCR. Bars show means of n=3-5 from 3 independent experiments ±SEM, significant p-values are indicated (Mann-Whitney-Test) (C) Western blots performed with lentivirally transduced cord blood CD34<sup>+</sup> cells showed an efficient downregulation of either BIM or BMF as well as overexpression of BCL-XL or BCL-2.

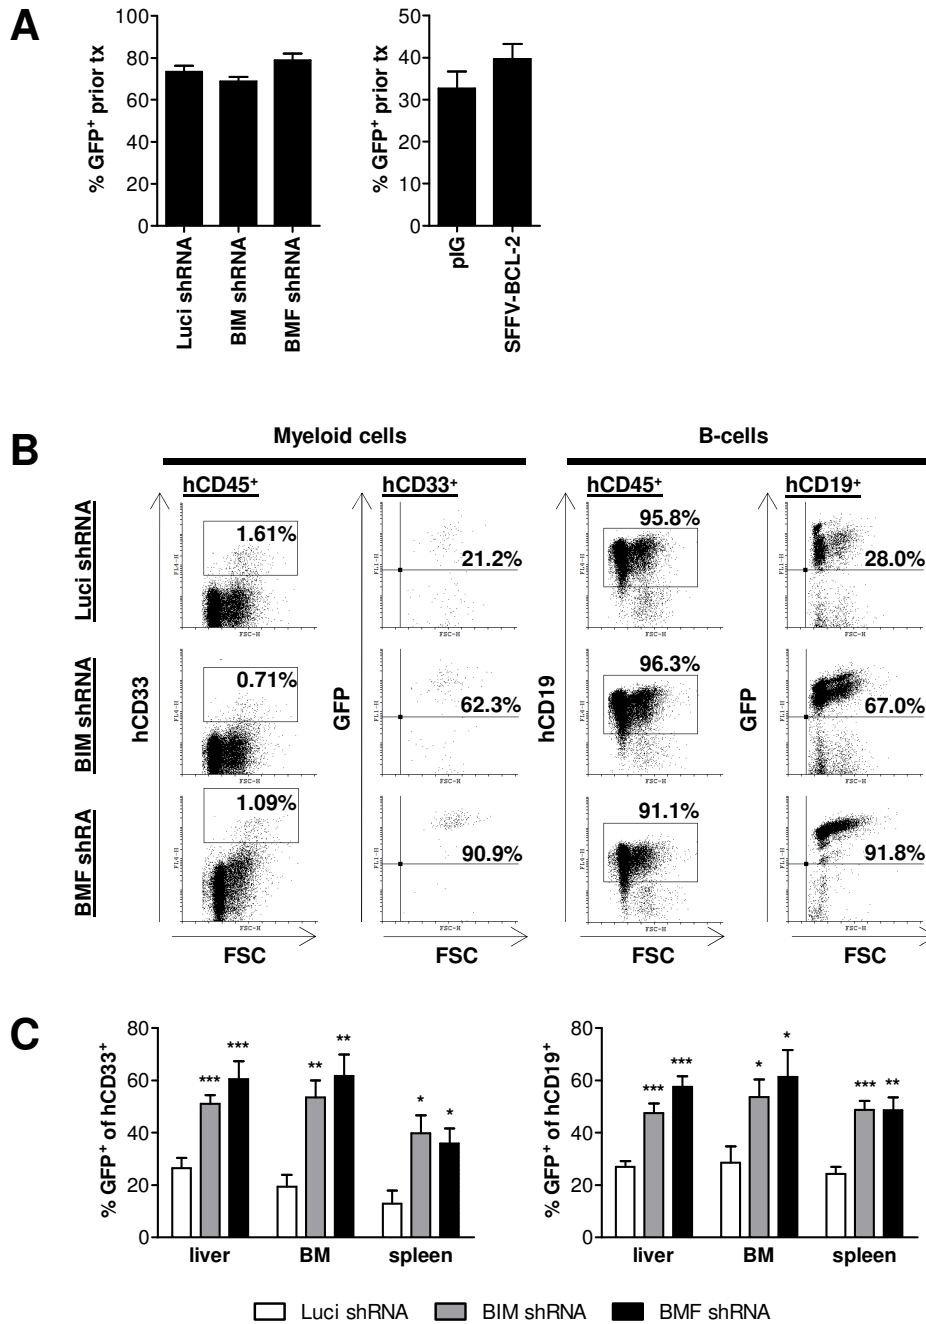

**Suppl. Figure 6:**

(A) Percentage of GFP<sup>+</sup> cells within CD34<sup>+</sup> cells prior transplantation was comparable between the groups. (B/C) Human CD34<sup>+</sup> cells were transduced with the indicated lentiviruses and injected i.h. into newborn *rag2<sup>-/-</sup>γc<sup>-/-</sup>* mice. 8 weeks later liver, BM and spleen were analysed. Cell suspensions were stained with human CD33 (left) or CD19 (right) and murine CD45 antibodies, and the percentages of GFP<sup>+</sup> cells within the human populations were determined. Dot blots of representative BM cells are shown (B). Bars represent percentages of GFP<sup>+</sup> cells within the CD33<sup>+</sup> or CD19<sup>+</sup> population (means +/- SEM from n=7-14 mice, 4-6 independent experiments). Significant p-values (Mann-Whitney-Test) for CD33<sup>+</sup> cells: Luci shRNA vs. BIM shRNA: liver p=0.0001, BM p=0.002, spleen p=0.02; Luci shRNA vs. BMF shRNA: liver p=0.001, BM p=0.002, spleen p=0.04. For CD19<sup>+</sup> cells: Luci shRNA vs. BIM shRNA: liver p=0.001, BM p=0.02, spleen p=0.0002; Luci shRNA vs. BMF shRNA: liver p=0.001, BM p=0.02, spleen p=0.002 (C).

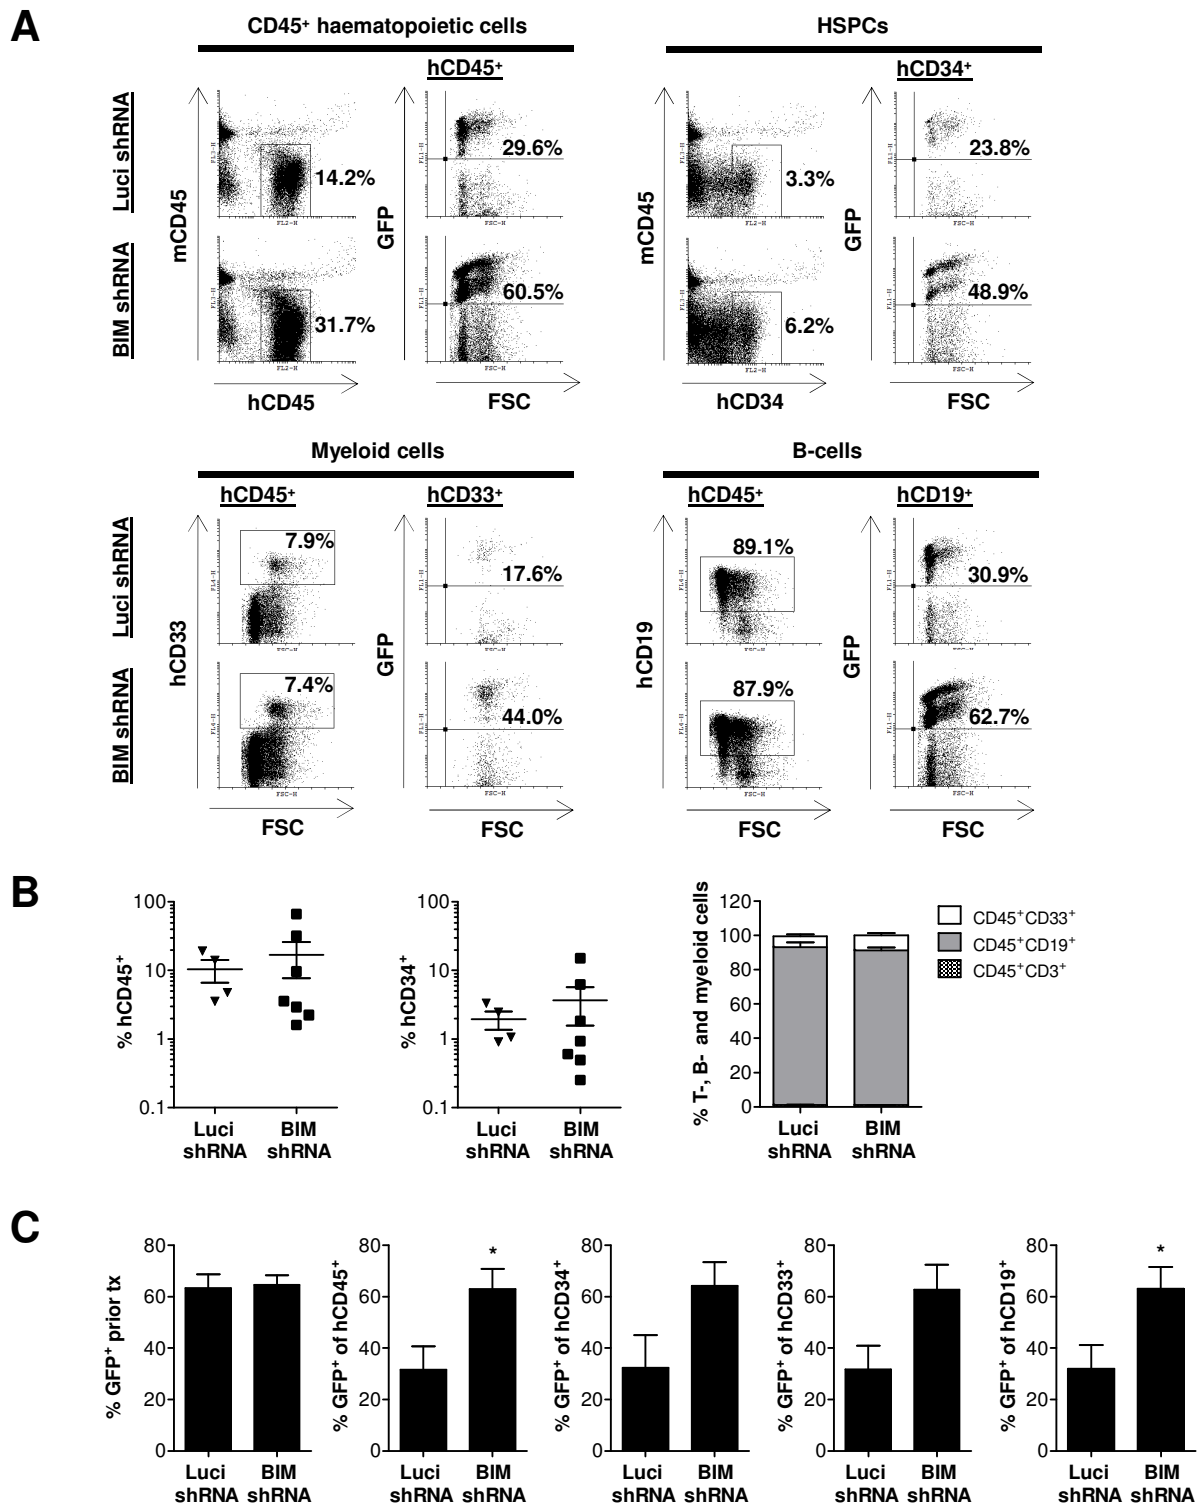

**Suppl. Figure 7:**

(A-C) 7 weeks old *rag2<sup>-/-</sup>γc<sup>-/-</sup>* mice were transplanted (i.v.) with human CD34<sup>+</sup> cells transduced with the indicated lentiviruses. 8 weeks later mice were killed and BM was harvested. (A) Representative dot plots of CD45<sup>+</sup>, CD34<sup>+</sup>, CD33<sup>+</sup> and CD19<sup>+</sup> cell populations. (B) Total BM engraftment of human CD45<sup>+</sup> cells (left) as well as percentages of immature CD34<sup>+</sup> cells (middle) and mature cell populations (right) were comparable between the two groups. (C) Percentage of GFP<sup>+</sup> cells prior transplantation was similar between the groups (left). However, knockdown of BIM increases percentages of GFP<sup>+</sup> cells in all BM subpopulations analysed. Bars represent means  $\pm$  SEM of n= 4-7 mice from 3 independent experiments. Mann-Whitney-Test was used, significant p-values are indicated by asterisks (p=0.04 in CD45<sup>+</sup> cells; p=0.02 in CD19<sup>+</sup> cells).
